# Supplementary material for: Antihypertensive Medication Adherence and Risk of Cardiovascular Disease Among Older Adults: A Population‐Based Cohort Study
Source: PubMed Central journal article supplement — J Am Heart Assoc. 2017 Jun 24;6(6):e006056. doi: 10.1161/JAHA.117.006056 (PMC5669200; doi:10.1161/jaha.117.006056), 2017-06-24
Supplement: JAH3-6-e006056-s001.pdf [file JAH3-6-e006056-s001.pdf]

# **SUPPLEMENTAL MATERIAL**

**Table S1.** Adjusted Hazards Ratios for Risk of CVD, IHD, Stroke/TIA and Heart Failure Events, and Population Attributable Fraction Associated With PDC by Beneficiaries Taking One vs Two or More Antihypertensives, Medicare 2008-2014 Cohort

| Characteristics                                         | Proportion Days Covered |                                     |                       | p-trend <sup>†</sup> | Adjusted PAF (95% CI) <sup>‡</sup> |
|---------------------------------------------------------|-------------------------|-------------------------------------|-----------------------|----------------------|------------------------------------|
|                                                         | <40% (low adherence)    | 40% to 79% (intermediate adherence) | ≥80% (high adherence) |                      |                                    |
| <b>Taking one antihypertensive*</b>                     |                         |                                     |                       |                      |                                    |
| <b>Number of Medicare beneficiaries and percent (%)</b> | 10 306 (10.7%)          | 32 353 (33.5%)                      | 53 808 (55.8%)        |                      |                                    |
| <b>CVD</b>                                              |                         |                                     |                       |                      |                                    |
| Events <sup>§</sup>                                     | 4 311 (4 242)           | 13 927 (13 792)                     | 12 232 (11 991)       |                      |                                    |
| Total person years                                      | 44 871                  | 149 301                             | 292 312               |                      |                                    |
| Crude incidence, per 1000 person years                  | 96.1 (96.0-96.2)        | 93.3 (93.2-93.3)                    | 41.8 (41.8-41.9)      |                      |                                    |
| HR adjusted for age, sex, and race only (95% CI)        | 1.0                     | 0.97 (0.94-1.0)                     | 0.42 (0.40-0.43)      | <.001                |                                    |
| Fully-adjusted HR <sup>  </sup>                         | 1.0                     | 1.0 (0.96-1.04)                     | 0.45 (0.43-0.46)      | <.001                | 33.8 (32.4-35.1)                   |
| <b>IHD</b>                                              |                         |                                     |                       |                      |                                    |
| IHD events <sup>§</sup>                                 | 2 398 (2 395)           | 7 964 (7 961)                       | 6 554 (6 541)         |                      |                                    |
| Total person years                                      | 48 542                  | 161 201                             | 300 356               |                      |                                    |
| Crude incidence, per 1000 person years                  | 49.4 (49.3-49.5)        | 49.4 (49.4-49.4)                    | 21.8 (21.8-21.8)      |                      |                                    |
| HR adjusted for age, sex, and race only (95% CI)        | 1.0                     | 0.99 (0.95-1.04)                    | 0.43 (0.41-0.45)      | <.001                |                                    |
| Fully-adjusted HR <sup>  </sup>                         | 1.0                     | 1.01 (0.96-1.05)                    | 0.45 (0.43-0.47)      | <.001                | 34.3 (32.4-36.1)                   |
| <b>Stroke/TIA</b>                                       |                         |                                     |                       |                      |                                    |
| Stroke/TIA events <sup>§</sup>                          | 717 (714)               | 2 017 (2 013)                       | 1 743 (1 731)         |                      |                                    |
| Total person years                                      | 54 910                  | 182 642                             | 313 463               |                      |                                    |
| Crude incidence, per 1000 person years                  | 13.1 (13.0-13.1)        | 11.0 (11.0-11.1)                    | 5.56 (5.55-5.57)      |                      |                                    |
| HR adjusted for age, sex, and race only (95% CI)        | 1.0                     | 0.85 (0.78-0.92)                    | 0.42 (0.39-0.46)      | <.001                |                                    |
| Fully-adjusted HR <sup>  </sup>                         | 1.0                     | 0.86 (0.79-0.94)                    | 0.44 (0.40-0.48)      | <.001                | 31.4 (27.6-35.0)                   |
| <b>Heart failure</b>                                    |                         |                                     |                       |                      |                                    |
| Heart failure events <sup>§</sup>                       | 890 (889)               | 2 667 (2 658)                       | 2 537 (2 526)         |                      |                                    |

|                                                         |                  |                  |                  |        |                  |
|---------------------------------------------------------|------------------|------------------|------------------|--------|------------------|
| Total person years                                      | 53 324           | 177 744          | 310 080          |        |                  |
| Crude incidence, per 1000 person years                  | 16.7 (16.7-16.8) | 15.0 (15.0-15.1) | 8.18 (8.17-8.19) |        |                  |
| HR adjusted for age, sex, and race only (95% CI)        | 1.0              | 0.93 (0.86-1.0)  | 0.52 (0.48-0.56) | <.0001 |                  |
| Fully-adjusted HR <sup>  </sup>                         | 1.0              | 1.0 (0.93-1.08)  | 0.59 (0.55-0.64) | <.0001 | 23.9 (20.8-27.0) |
| <b>Taking two or more antihypertensives*</b>            |                  |                  |                  |        |                  |
| <b>Number of Medicare beneficiaries and percent (%)</b> | 3 593 (6.1%)     | 14 728 (24.9%)   | 40 809 (69.0%)   |        |                  |
| <b>CVD</b>                                              |                  |                  |                  |        |                  |
| Events <sup>§</sup>                                     | 1 636 (1 615)    | 6 464 (6 395)    | 8 628 (8457)     |        |                  |
| Total person years                                      | 15 730           | 67 968           | 228 439          |        |                  |
| Crude incidence, per 1000 person years                  | 104 (104-105)    | 95.1 (95.0-95.2) | 37.8 (37.7-37.8) |        |                  |
| HR adjusted for age, sex, and race only (95% CI)        | 1.0              | 0.93 (0.86-1.0)  | 0.52 (0.48-0.56) | <.001  |                  |
| Fully-adjusted HR <sup>  </sup>                         | 1.0              | 1.0 (0.93-1.08)  | 0.59 (0.55-0.64) | <.001  | 25.6 (24.4-26.9) |
| <b>IHD</b>                                              |                  |                  |                  |        |                  |
| IHD events <sup>§</sup>                                 | 881 (881)        | 3 639 (3 635)    | 4 555 (4 545)    |        |                  |
| Total person years                                      | 17 139           | 73 799           | 23 4143          |        |                  |
| Crude incidence, per 1000 person years                  | 51.4 (51.3-51.5) | 49.3 (49.3-49.4) | 19.5 (19.4-19.5) |        |                  |
| HR adjusted for age, sex, and race only (95% CI)        | 1.0              | 0.93 (0.86-1.0)  | 0.52 (0.48-0.56) | <.001  |                  |
| Fully-adjusted HR <sup>  </sup>                         | 1.0              | 1.0 (0.93-1.08)  | 0.59 (0.55-0.64) | <.001  | 26.2 (24.5-27.8) |
| <b>Stroke/TIA</b>                                       |                  |                  |                  |        |                  |
| Stroke/TIA events <sup>§</sup>                          | 262 (260)        | 911 (909)        | 1 104 (1 093)    |        |                  |
| Total person years                                      | 19 364           | 84 145           | 243 497          |        |                  |
| Crude incidence, per 1000 person years                  | 13.5 (13.5-13.6) | 10.8 (10.8-10.8) | 4.53 (4.53-4.54) |        |                  |
| HR adjusted for age, sex, and race only (95% CI)        | 1.0              | 0.93 (0.86-1.0)  | 0.52 (0.48-0.56) | <.001  |                  |
| Fully-adjusted HR <sup>  </sup>                         | 1.0              | 1.0 (0.93-1.08)  | 0.59 (0.55-0.64) | <.001  | 23.9 (20.6-27.1) |
| <b>Heart failure</b>                                    |                  |                  |                  |        |                  |
| Heart failure events <sup>§</sup>                       | 379 (379)        | 1320 (1 314)     | 1 925 (1 914)    |        |                  |
| Total person years                                      | 18 636           | 81 145           | 240 215          |        |                  |

|                                                  |                  |                  |                  |       |                  |
|--------------------------------------------------|------------------|------------------|------------------|-------|------------------|
| Crude incidence, per 1000 person years           | 20.3 (20.3-20.4) | 16.3 (16.2-16.3) | 8.01 (8.00-8.02) |       |                  |
| HR adjusted for age, sex, and race only (95% CI) | 1.0              | 0.93 (0.86-1.0)  | 0.52 (0.48-0.56) | <.001 |                  |
| Fully-adjusted HR <sup>  </sup>                  | 1.0              | 1.0 (0.93-1.08)  | 0.59 (0.55-0.64) | <.001 | 18.2 (15.6-20.8) |

Abbreviations: CI, confidence interval; CVD, cardiovascular disease; HR, hazard ratio; IHD, ischemic heart disease; PAF, population attributable fraction; TIA, transient ischemic attack.

\* For the number of antihypertensive medications use, first, we calculated the total days of antihypertensive medications coverage for beneficiaries who took one, two, three or more medications during the period of follow-up respectively, and second, we classified the beneficiaries into one, and two or more medications use groups if he/she took one, or two or more medications for  $\geq 75\%$  of days during the follow-up. The beneficiaries who did not fall into the above defined one, or two or more medications use groups were excluded from this sensitivity analysis.

† P-value for trends across the categories of proportion days covered; all tests two-tailed.

‡ PAF adjusted for age, sex, race/ethnicity, urban-rural residence, statins use, number of antihypertensive medications, status of low-income subsidy, out of pocket medications payment/day, Charlson-Comorbidity-Index, and 10 chronic conditions at baseline.

§ CVD events included both fatal and non-fatal events, and numbers in parentheses indicate the non-fatal events.

|| Adjusted for age, sex, race/ethnicity, urban-rural residence, statins use, number of antihypertensive medications, status of low-income subsidy, out of pocket medications payment/day, Charlson-Comorbidity-Index, and 10 chronic conditions at baseline.

**Table S2.** Adjusted Hazards Ratios for Risk of CVD, IHD, Stroke/TIA and Heart Failure Events, and Population Attributable Fraction Associated With First Year PDC, Medicare 2008-2014 Cohort

| Characteristics                                         | Proportion Days Covered* |                                     |                       | p-trend <sup>†</sup> | Adjusted PAF (95% CI) <sup>‡</sup> |
|---------------------------------------------------------|--------------------------|-------------------------------------|-----------------------|----------------------|------------------------------------|
|                                                         | <40% (low adherence)     | 40% to 79% (intermediate adherence) | ≥80% (high adherence) |                      |                                    |
| <b>Number of Medicare beneficiaries and percent (%)</b> | 22 044 (14.2%)           | 30 880 (19.8%)                      | 102 673 (66.0%)       |                      |                                    |
| <b>CVD</b>                                              |                          |                                     |                       |                      |                                    |
| Events <sup>§</sup>                                     | 7 165 (7 034)            | 9 736 (9 593)                       | 30 297 (29 865)       |                      |                                    |
| Total person years                                      | 106 313                  | 155 625                             | 536 683               |                      |                                    |
| Crude incidence, per 1000 person years                  | 67.4 (67.3-67.4)         | 62.6 (62.5-62.6)                    | 56.5 (56.4-56.5)      |                      |                                    |
| HR adjusted for age, sex, and race only (95% CI)        | 1.0                      | 0.94 (0.91-0.97)                    | 0.85 (0.83-0.88)      | <.001                |                                    |
| Fully-adjusted HR <sup>  </sup>                         | 1.0                      | 0.98 (0.95-1.01)                    | 0.96 (0.93-0.98)      | 0.003                | 1.4 (0.6- 2.3)                     |
| <b>IHD</b>                                              |                          |                                     |                       |                      |                                    |
| IHD events <sup>§</sup>                                 | 3 874 (3 870)            | 5 406 (5 400)                       | 16 711 (16 688)       |                      |                                    |
| Total person years                                      | 111 770                  | 162 930                             | 560 481               |                      |                                    |
| Crude incidence, per 1000 person years                  | 34.7 (34.6-34.7)         | 33.2 (33.2-33.2)                    | 29.8 (29.8-29.8)      |                      |                                    |
| HR adjusted for age, sex, and race only (95% CI)        | 1.0                      | 0.97 (0.93-1.01)                    | 0.88 (0.84-0.91)      | <.001                |                                    |
| Fully-adjusted HR <sup>  </sup>                         | 1.0                      | 0.99 (0.95-1.03)                    | 0.96 (0.93-1.0)       | 0.047                | 1.4 (0.3- 2.6)                     |
| <b>Stroke/TIA</b>                                       |                          |                                     |                       |                      |                                    |
| Stroke/TIA events <sup>§</sup>                          | 1 154 (1 148)            | 1 442 (1 436)                       | 4 158 (4 136)         |                      |                                    |
| Total person years                                      | 120 483                  | 176 131                             | 601 408               |                      |                                    |
| Crude incidence, per 1000 person years                  | 9.58 (9.56- 9.6)         | 8.19 (8.17- 8.2)                    | 6.91 (6.91-6.92)      |                      |                                    |
| HR adjusted for age, sex, and race only (95% CI)        | 1.0                      | 0.87 (0.80-0.94)                    | 0.74 (0.69-0.79)      | <.001                |                                    |
| Fully-adjusted HR <sup>  </sup>                         | 1.0                      | 0.90 (0.83-0.97)                    | 0.82 (0.77-0.88)      | <.001                | 5.4 (3.4 - 7.8)                    |
| <b>Heart failure</b>                                    |                          |                                     |                       |                      |                                    |
| Heart failure events <sup>§</sup>                       | 1 573 (1 565)            | 2 021 (2 015)                       | 6 124 (6 100)         |                      |                                    |
| Total person years                                      | 118 121                  | 172 504                             | 590 520               |                      |                                    |
| Crude incidence, per 1000 person years                  | 13.3 (13.3-13.3)         | 11.7 (11.7-11.7)                    | 10.4 (10.4-10.4)      |                      |                                    |
| HR adjusted for age, sex, and race only (95% CI)        | 1.0                      | 0.91 (0.85-0.98)                    | 0.85 (0.80-0.89)      | <.001                |                                    |
| Fully-adjusted HR <sup>  </sup>                         | 1.0                      | 0.98 (0.92-1.05)                    | 0.98 (0.92-1.03)      | 0.411                | N/A                                |

Abbreviations: CI, confidence interval; CVD, cardiovascular disease; HR, hazard ratio; IHD, ischemic heart disease; PAF, population attributable fraction; TIA, transient ischemic attack.

\* We calculated the interval-based cumulative PDC of one or more ( $\geq 1$ ) antihypertensives on hand during the first year of follow-up or follow-up to the first fatal or nonfatal CVD events for the beneficiaries who had a CVD event within first year of follow-up using information in Medicare Part D drug claim data.

† P-value for trends across the categories of proportion days covered; all tests two-tailed.

‡ PAF adjusted for age, sex, race/ethnicity, urban-rural residence, statins use, number of antihypertensive medications, status of low-income subsidy, out of pocket medications payment/day, Charlson-Comorbidity-Index, and 10 chronic conditions at baseline.

§ CVD events included both fatal and non-fatal events, and numbers in parentheses indicate the non-fatal events.

|| Adjusted for age, sex, race/ethnicity, urban-rural residence, statins use, number of antihypertensive medications, status of low-income subsidy, out of pocket medications payment/day, Charlson-Comorbidity-Index, and 10 chronic conditions at baseline.

**Table S3.** Adjusted Hazards Ratios for Risk of CVD, IHD, Stroke/TIA and Heart Failure Events, and Population Attributable Fraction Associated With Interval-Based Average PDC, Medicare 2008-2014 Cohort

| Characteristics                                         | Average Proportion Days Covered* |                                     |                       | p-trend <sup>†</sup> | Adjusted PAF (95% CI) <sup>‡</sup> |
|---------------------------------------------------------|----------------------------------|-------------------------------------|-----------------------|----------------------|------------------------------------|
|                                                         | <40% (low adherence)             | 40% to 79% (intermediate adherence) | ≥80% (high adherence) |                      |                                    |
| <b>Number of Medicare beneficiaries and percent (%)</b> | 16 083 (10.3%)                   | 78 954 (50.7%)                      | 60 560 (38.9%)        |                      |                                    |
| <b>CVD</b>                                              |                                  |                                     |                       |                      |                                    |
| Events <sup>§</sup>                                     | 7 188 (7 008)                    | 29 086 (28 326)                     | 10 924 (10 392)       |                      |                                    |
| Total person years                                      | 70 363                           | 387 862                             | 340 396               |                      |                                    |
| Crude incidence, per 1000 person years                  | 102 (102 - 102)                  | 75.0 (75.0 - 75.1)                  | 32.1 (32.1 - 32.1)    |                      |                                    |
| HR adjusted for age, sex, and race only (95% CI)        | 1.0                              | 0.72 (0.70-0.74)                    | 0.30 (0.29-0.31)      | <0.001               |                                    |
| Fully-adjusted HR <sup>  </sup>                         | 1.0                              | 0.77 (0.75-0.79)                    | 0.34 (0.33-0.35)      | <0.001               | 45.4 (44.2-46.5)                   |
| <b>IHD</b>                                              |                                  |                                     |                       |                      |                                    |
| IHD events <sup>§</sup>                                 | 4 013 (3 965)                    | 16 072 (15 872)                     | 5 906 (5 769)         |                      |                                    |
| Total person years                                      | 76 644                           | 411 024                             | 347 513               |                      |                                    |
| Crude incidence, per 1000 person years                  | 52.4 (52.3 - 52.4)               | 39.1 (39.1-39.1)                    | 17.0 (17.0 – 17.1)    |                      |                                    |
| HR adjusted for age, sex, and race only (95% CI)        | 1.0                              | 0.74 (0.71 - 0.77)                  | 0.32 (0.30-0.33)      | <0.001               |                                    |
| Fully-adjusted HR <sup>  </sup>                         | 1.0                              | 0.78 (0.75 - 0.81)                  | 0.35 (0.34-0.37)      | <0.001               | 44.4 (42.9-46.0)                   |
| <b>Stroke/TIA</b>                                       |                                  |                                     |                       |                      |                                    |
| Stroke/TIA events <sup>§</sup>                          | 1 106 (1 089)                    | 4 103(4 006)                        | 1 545(1 467)          |                      |                                    |
| Total person years                                      | 87 538                           | 451 129                             | 359 355               |                      |                                    |
| Crude incidence, per 1000 person years                  | 12.6 (12.6-12.7)                 | 9.1 (9.09- 9.10)                    | 4.3 (4.29-4.31)       |                      |                                    |
| HR adjusted for age, sex, and race only (95% CI)        | 1.0                              | 0.73 (0.68-0.78)                    | 0.34 (0.31-0.37)      | <0.001               |                                    |
| Fully-adjusted HR <sup>  </sup>                         | 1.0                              | 0.78 (0.73-0.83)                    | 0.39 (0.36-0.42)      | <0.001               | 40.9 (37.7- 44.0)                  |
| <b>Heart failure</b>                                    |                                  |                                     |                       |                      |                                    |
| Heart failure events <sup>§</sup>                       | 1 511 (1 473)                    | 5 939 (5 775)                       | 2 268 (2 164)         |                      |                                    |
| Total person years                                      | 84 486                           | 440 454                             | 35 6204               |                      |                                    |
| Crude incidence, per 1000 person years                  | 17.9 (17.9-17.9)                 | 13.5 (13.5-13.5)                    | 6.4 (6.36-6.38)       |                      |                                    |
| HR adjusted for age, sex, and race only (95% CI)        | 1.0                              | 0.78 (0.74-0.83)                    | 0.38 (0.35- 0.4)      | <0.001               |                                    |

|                                 |     |                  |                  |        |                  |
|---------------------------------|-----|------------------|------------------|--------|------------------|
| Fully-adjusted HR <sup>  </sup> | 1.0 | 0.86 (0.81-0.91) | 0.44 (0.41-0.47) | <0.001 | 38.7 (36.1-41.4) |
|---------------------------------|-----|------------------|------------------|--------|------------------|

---

Abbreviations: CI, confidence interval; CVD, cardiovascular disease; HR, hazard ratio; IHD, ischemic heart disease; PAF, population attributable fraction; TIA, transient ischemic attack.

\* For the calculation of the interval-based average PDC, it calculates PDC for each medication separately, then averages each individual PDC to get the overall PDC. For example, for beneficiaries taking two classes of antihypertensives, the interval-based PDC for each medication was calculated, and then two PDCs were averaged to get overall average PDC.

† P-value for trends across the categories of proportion days covered; all tests two-tailed.

‡ PAF adjusted for age, sex, race/ethnicity, urban-rural residence, statins use, number of antihypertensive medications, status of low-income subsidy, out of pocket medications payment/day, Charlson-Comorbidity-Index, and 10 chronic conditions at baseline.

§ CVD events included both fatal and non-fatal events, and numbers in parentheses indicate the non-fatal events.

|| Adjusted for age, sex, race/ethnicity, urban-rural residence, statins use, number of antihypertensive medications, status of low-income subsidy, out of pocket medications payment/day, Charlson-Comorbidity-Index, and 10 chronic conditions at baseline.



**Figure S1.** Adjusted Hazard Ratios (95% CI) for CVD Events (**A**), IHD (**B**), Stroke/TIA (**C**) and Heart Failure Events (**D**) Associated With Interval-Based Average PDC, Medicare 2008-2014 Cohort. CVD indicates cardiovascular disease; IHD, ischemic heart disease; PDC, proportion days covered; TIA, transient ischemic attack.

**A**

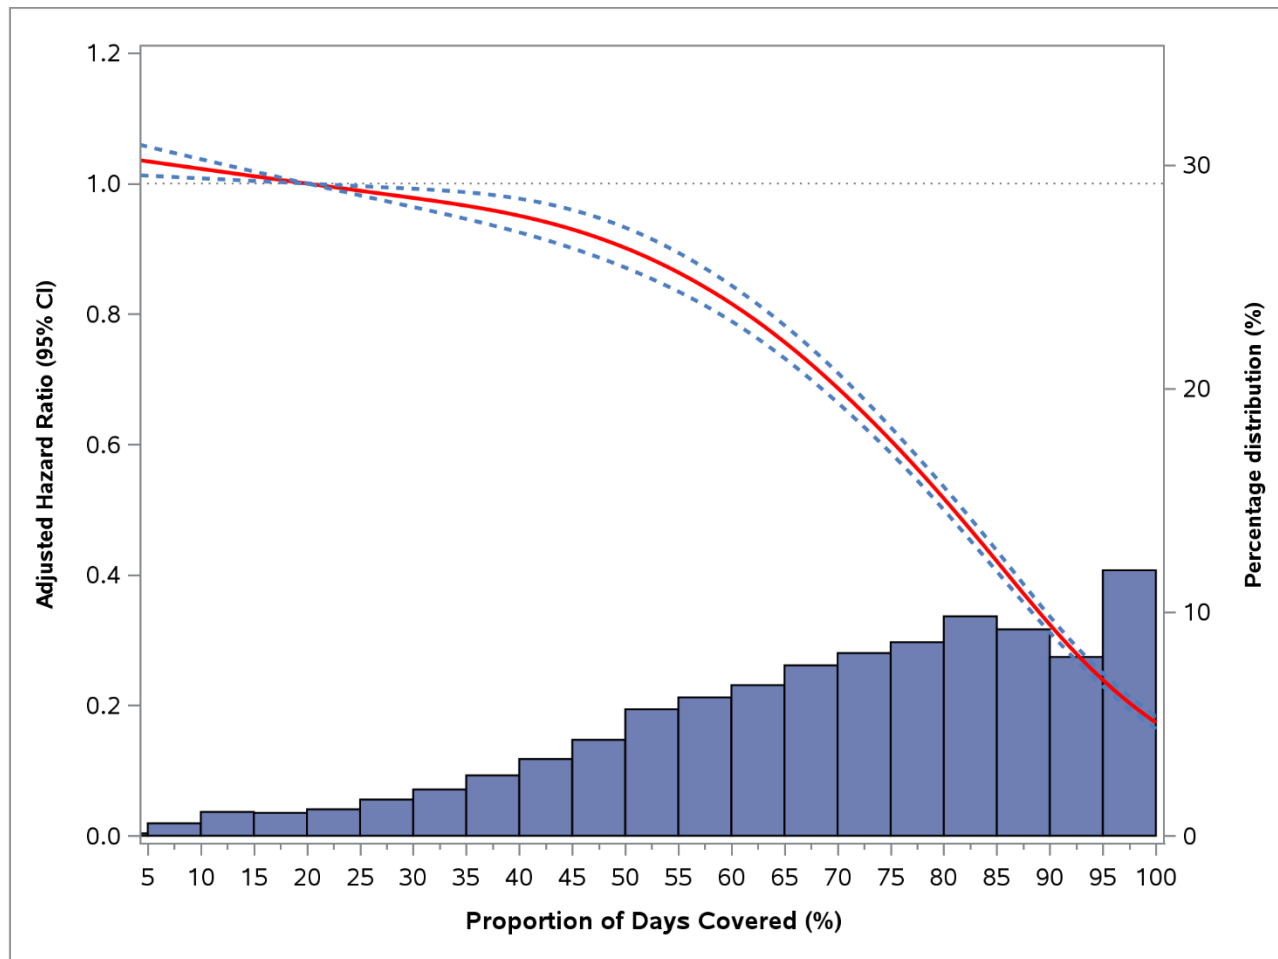

**B**

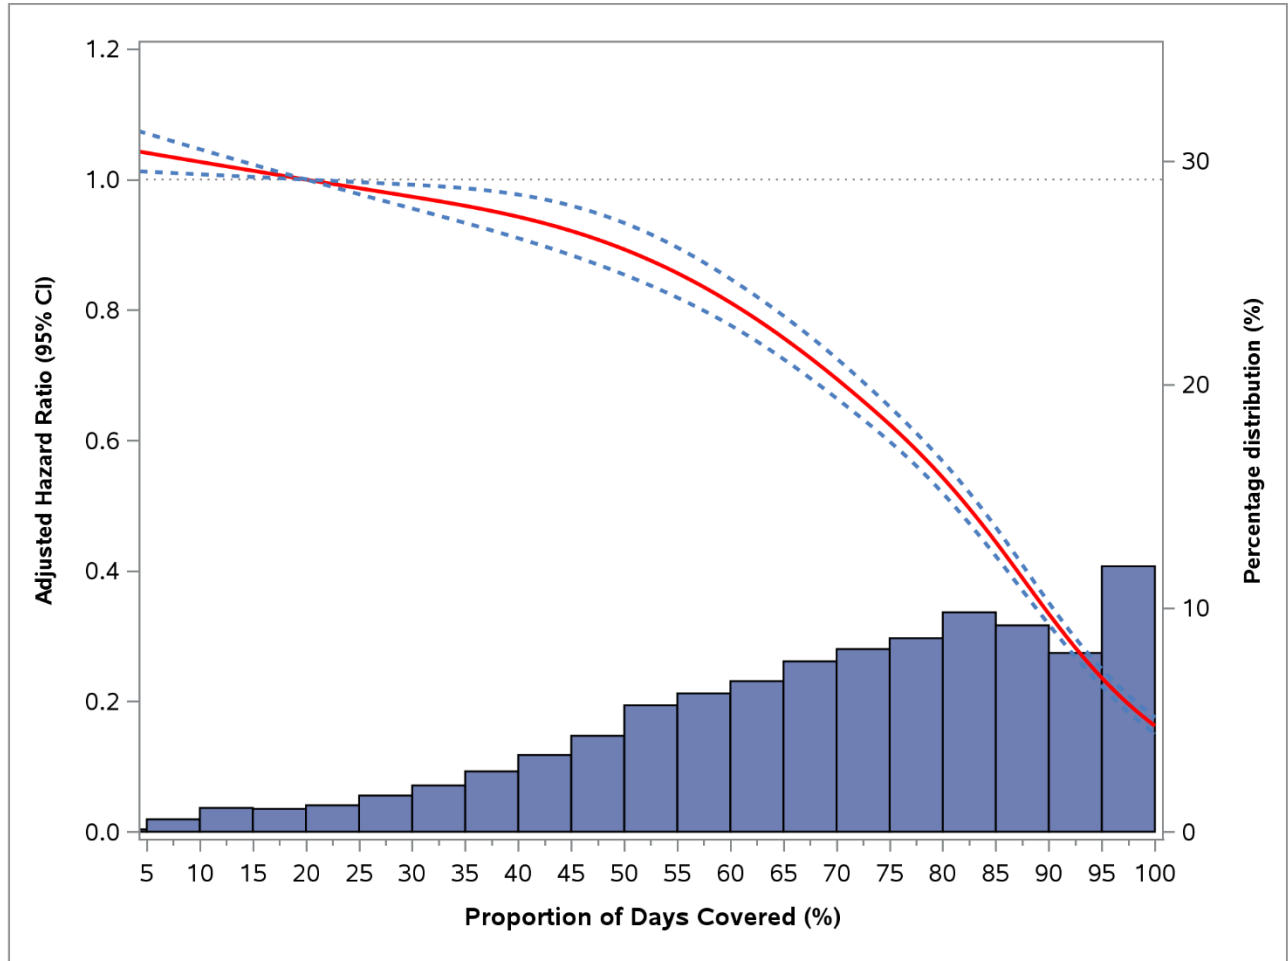

C

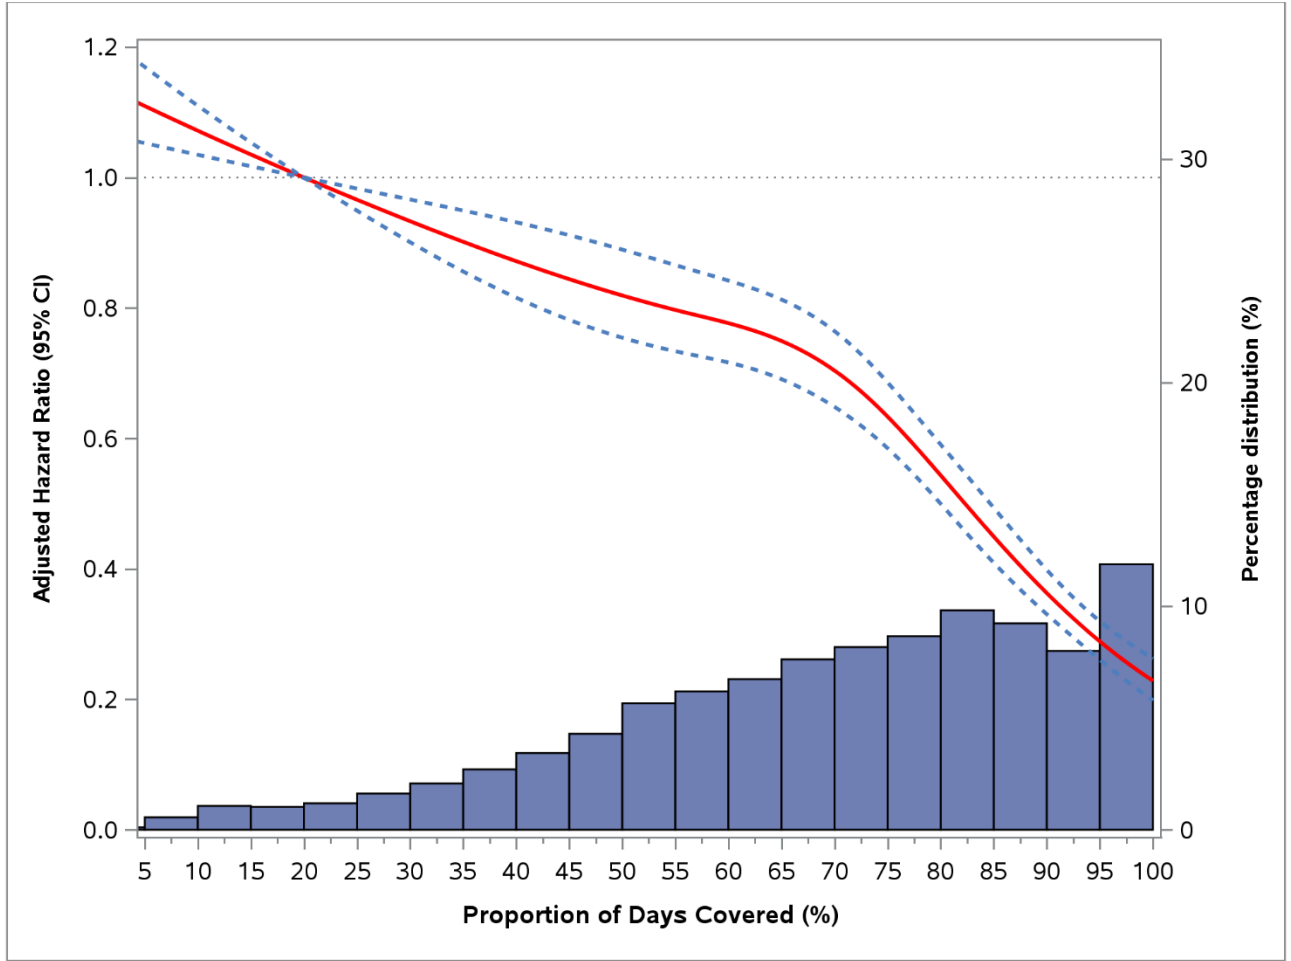

**D**

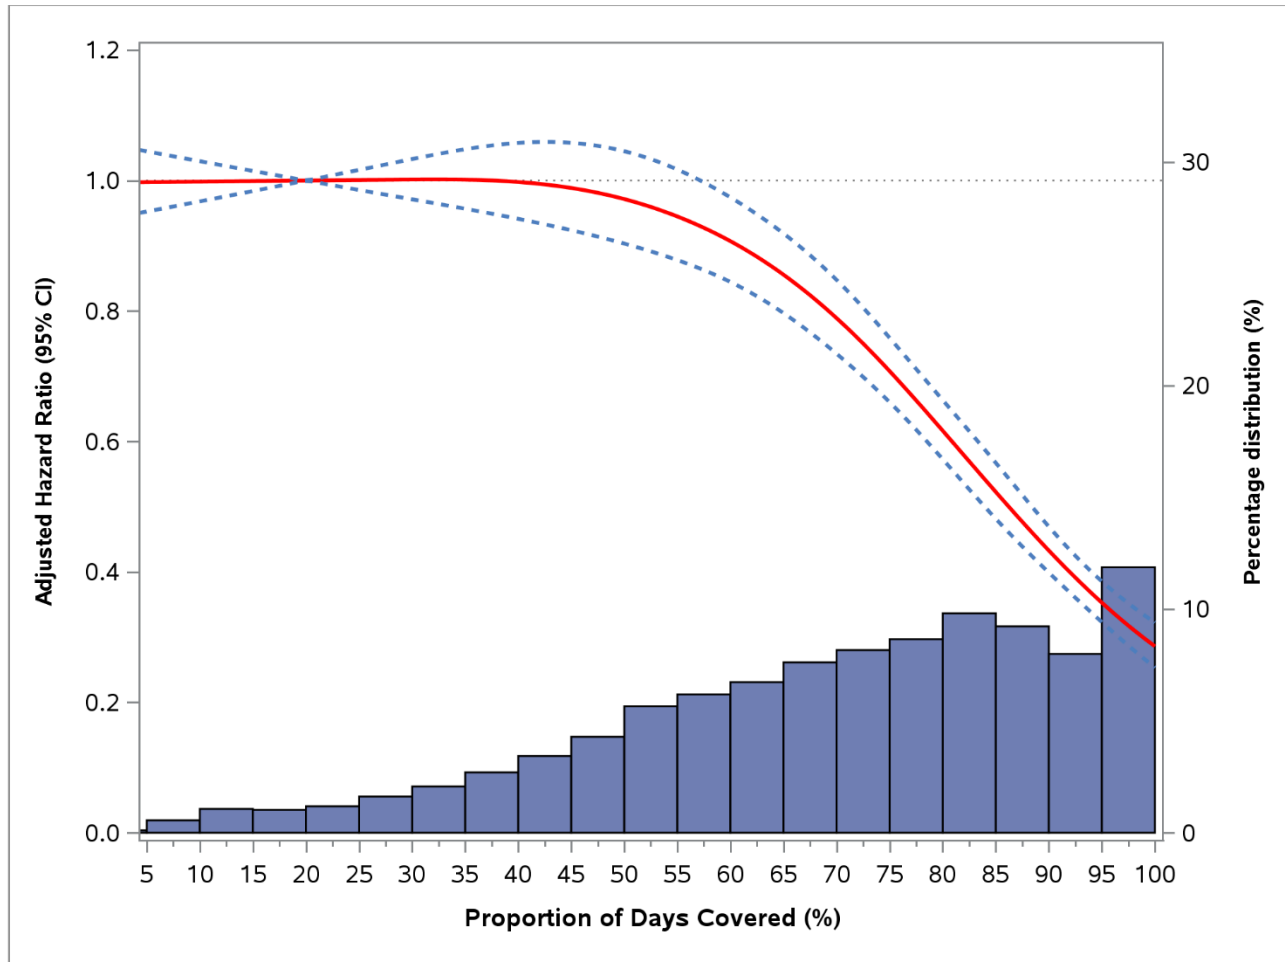

For the dose-response analyses of relationship between average PDC and CVD events, we used the 20th percentile PDC as the referent value (mid-value among beneficiaries with <40% PDC).
